# Supplementary material
Source: PubMed Central journal article supplement (PMC4830132)

# SUPPORTING INFORMATION

## Nucleobase Recognition By Truncated $\alpha$ -Hemolysin Pores

*Mariam Ayub<sup>1a</sup>, David Stoddart<sup>2a</sup> and Hagan Bayley<sup>1\*</sup>*

<sup>1</sup>Department of Chemistry, University of Oxford, Oxford, OX1 3TA, United Kingdom

<sup>2</sup>Present address: Oxford Nanopore Technologies, Oxford OX4 4GA, United Kingdom

<sup>a</sup>These authors contributed equally to this work

\*Correspondence and requests for materials should be addressed to H.B. (email: [hagan.bayley@chem.ox.ac.uk](mailto:hagan.bayley@chem.ox.ac.uk))

**Table S1.** Sequences of the oligonucleotides used in this study. B represents the 3' biotin-TEG tag and linker (**Figure S1**).

| Oligonucleotide name    | Oligonucleotide sequence (5'→3')                           |
|-------------------------|------------------------------------------------------------|
| poly(dC) <sub>40</sub>  | CCCCCCCCCCCCCCCCCCCCCCCCCCCCCCCCCCCCCCCCCCCCCCCCCCCCCCCC-B |
| poly(dC) <sup>A7</sup>  | CCCCCCCCCCCCCCCCCCCCCCCCCCCCCCCCCCCCCCCCCCCCACCCCCC-B      |
| poly(dC) <sup>A8</sup>  | CCCCCCCCCCCCCCCCCCCCCCCCCCCCCCCCCCCCCCCCCCCCACCCCCC-B      |
| poly(dC) <sup>A9</sup>  | CCCCCCCCCCCCCCCCCCCCCCCCCCCCCCCCCCCCCCCCCCCCACCCCCC-B      |
| poly(dC) <sup>A10</sup> | CCCCCCCCCCCCCCCCCCCCCCCCCCCCCCCCCCCCCCCCCCCCACCCCCC-B      |
| poly(dC) <sup>A11</sup> | CCCCCCCCCCCCCCCCCCCCCCCCCCCCCCCCCCCCCCCCCCCCACCCCCC-B      |
| poly(dC) <sup>A12</sup> | CCCCCCCCCCCCCCCCCCCCCCCCCCCCCCCCCCCCCCCCCCCCACCCCCC-B      |
| poly(dC) <sup>A13</sup> | CCCCCCCCCCCCCCCCCCCCCCCCCCCCCCCCCCCCCCCCCCCCACCCCCC-B      |
| poly(dC) <sup>A14</sup> | CCCCCCCCCCCCCCCCCCCCCCCCCCCCCCCCCCCCCCCCCCCCACCCCCC-B      |
| poly(dC) <sup>A15</sup> | CCCCCCCCCCCCCCCCCCCCCCCCCCCCCCCCCCCCCCCCCCCCACCCCCC-B      |
| poly(dC) <sup>A16</sup> | CCCCCCCCCCCCCCCCCCCCCCCCCCCCCCCCCCCCCCCCCCCCACCCCCC-B      |
| poly(dC) <sup>A17</sup> | CCCCCCCCCCCCCCCCCCCCCCCCCCCCCCCCCCCCCCCCCCCCACCCCCC-B      |
| poly(dC) <sup>A18</sup> | CCCCCCCCCCCCCCCCCCCCCCCCCCCCCCCCCCCCCCCCCCCCACCCCCC-B      |
| poly(dC) <sup>A19</sup> | CCCCCCCCCCCCCCCCCCCCCCCCCCCCCCCCCCCCCCCCCCCCACCCCCC-B      |
| poly(dC) <sup>A20</sup> | CCCCCCCCCCCCCCCCCCCCCCCCCCCCCCCCCCCCCCCCCCCCACCCCCC-B      |
| poly(dC) <sup>T14</sup> | CCCCCCCCCCCCCCCCCCCCCCCCCCCCCCCCCCCCCCCCCTCCCCCCCCC-B      |
| poly(dC) <sup>G14</sup> | CCCCCCCCCCCCCCCCCCCCCCCCCCCCCCCCCCCCCCCCCGCCCCCCCCC-B      |
| poly(dC) <sup>T16</sup> | CCCCCCCCCCCCCCCCCCCCCCCCCCCCCCCCCCCCCCCCCTCCCCCCCCC-B      |
| poly(dC) <sup>G16</sup> | CCCCCCCCCCCCCCCCCCCCCCCCCCCCCCCCCCCCCCCCCGCCCCCCCCC-B      |
| poly(dC) <sup>T18</sup> | CCCCCCCCCCCCCCCCCCCCCCCCCCCCCCCCCCCCCCCCCTCCCCCCCCC-B      |
| poly(dC) <sup>G18</sup> | CCCCCCCCCCCCCCCCCCCCCCCCCCCCCCCCCCCCCCCCCGCCCCCCCCC-B      |

**Table S2.** Residual currents ( $I_{RES\%}$ ) for poly(dC) and oligonucleotides that contain a single adenine nucleobase for the  $\alpha$ HL TBM $\Delta$ 2 and TBM $\Delta$ 4 proteins. The position of a single adenine ( $A_x$ ) nucleobase (nucleobase position between 7-20) is numbered relative to the 3' biotin tag. The  $I_{RES\%}$  values are the mean values ( $\pm$  sd) from  $n \geq 3$  experiments.  $\Delta I_{RES\%}$  is defined as the difference in residual current between an  $A_x$  oligonucleotide and poly(dC) ( $I_{RES\%}^{A_x \text{ oligo}} - I_{RES\%}^{pC}$ ). The mean of the  $\Delta I_{RES\%}$  values from individual experiments and the associated error ( $\pm$  sd) are given. The data were collected by using the voltage protocol described in Experimental Methods. Briefly, +160 mV was applied for 900 ms to drive the negatively charged DNA into the pore, followed by -140 mV for 50 ms, to eject the immobilized DNA and a final step to 0 mV for 50 ms.

| Position of adenine | TBM $\Delta$ 2      |                    |                      | Position of adenine | TBM $\Delta$ 4      |                    |                      |
|---------------------|---------------------|--------------------|----------------------|---------------------|---------------------|--------------------|----------------------|
|                     | $I_{RES}^{A_x}$ (%) | $I_{RES}^{pC}$ (%) | $\Delta I_{RES}$ (%) |                     | $I_{RES}^{A_x}$ (%) | $I_{RES}^{pC}$ (%) | $\Delta I_{RES}$ (%) |
| 7                   | 35.2 $\pm$ 0.2      | 35.2 $\pm$ 0.2     | 0.0 $\pm$ 0.0        | 7                   | 31.3 $\pm$ 0.1      | 31.3 $\pm$ 0.1     | 0.0 $\pm$ 0.0        |
| 8                   | 35.4 $\pm$ 0.4      | 35.2 $\pm$ 0.3     | +0.2 $\pm$ 0.1       | 8                   | 30.9 $\pm$ 1.5      | 30.8 $\pm$ 1.4     | +0.1 $\pm$ 0.1       |
| 9                   | 34.9 $\pm$ 0.6      | 35.3 $\pm$ 0.6     | -0.5 $\pm$ 0.0       | 9                   | 30.2 $\pm$ 1.0      | 30.8 $\pm$ 1.0     | -0.6 $\pm$ 0.0       |
| 10                  | 34.2 $\pm$ 0.4      | 35.0 $\pm$ 0.5     | -0.8 $\pm$ 0.1       | 10                  | 29.3 $\pm$ 2.7      | 29.8 $\pm$ 2.9     | -0.4 $\pm$ 0.2       |
| 11                  | 34.9 $\pm$ 0.4      | 35.2 $\pm$ 0.4     | -0.3 $\pm$ 0.1       | 11                  | 29.3 $\pm$ 2.2      | 29.1 $\pm$ 2.2     | +0.2 $\pm$ 0.1       |
| 12                  | 35.1 $\pm$ 0.5      | 35.1 $\pm$ 0.5     | 0.0 $\pm$ 0.0        | 12                  | 30.5 $\pm$ 3.0      | 30.0 $\pm$ 2.9     | +0.5 $\pm$ 0.1       |
| 13                  | 35.2 $\pm$ 1.1      | 34.6 $\pm$ 1.2     | +0.5 $\pm$ 0.1       | 13                  | 31.5 $\pm$ 2.3      | 30.8 $\pm$ 2.3     | +0.7 $\pm$ 0.0       |
| 14                  | 35.9 $\pm$ 0.4      | 35.3 $\pm$ 0.4     | +0.6 $\pm$ 0.0       | 14                  | 30.7 $\pm$ 1.6      | 30.7 $\pm$ 1.7     | -0.1 $\pm$ 0.1       |
| 15                  | 35.5 $\pm$ 0.7      | 35.5 $\pm$ 0.7     | +0.0 $\pm$ 0.0       | 15                  | 29.2 $\pm$ 1.6      | 30.5 $\pm$ 1.6     | -1.4 $\pm$ 0.0       |
| 16                  | 33.5 $\pm$ 0.3      | 34.7 $\pm$ 0.4     | -1.3 $\pm$ 0.1       | 16                  | 29.2 $\pm$ 1.3      | 30.5 $\pm$ 1.3     | -1.3 $\pm$ 0.0       |
| 17                  | 33.9 $\pm$ 0.3      | 35.2 $\pm$ 0.3     | -1.4 $\pm$ 0.0       | 17                  | 30.7 $\pm$ 1.7      | 31.3 $\pm$ 1.8     | -0.6 $\pm$ 0.1       |
| 18                  | 34.0 $\pm$ 0.4      | 34.5 $\pm$ 0.4     | -0.5 $\pm$ 0.1       | 18                  | 31.3 $\pm$ 1.5      | 31.3 $\pm$ 1.5     | 0.0 $\pm$ 0.0        |
| 19                  | 34.1 $\pm$ 0.9      | 34.1 $\pm$ 0.9     | 0.0 $\pm$ 0.0        | 19                  | 31.9 $\pm$ 1.7      | 31.9 $\pm$ 1.7     | 0.0 $\pm$ 0.0        |
| 20                  | 34.4 $\pm$ 1.5      | 34.4 $\pm$ 1.5     | 0.0 $\pm$ 0.0        | 20                  | 31.4 $\pm$ 0.1      | 31.4 $\pm$ 0.1     | -0.1 $\pm$ 0.1       |

**Table S3.** Residual currents ( $I_{RES\%}$ ) for poly(dC) and oligonucleotides that contain a single adenine nucleobase for the TBM $\Delta$ 6 and TBM $\Delta$ 6/M113G pores. The position of a single adenine ( $A_x$ ) nucleobase (nucleobase position between 7-20) is numbered relative to the 3' biotin tag. The  $I_{RES\%}$  values are the mean values ( $\pm$  sd) from  $n \geq 3$  experiments.  $\Delta I_{RES\%}$  is defined as the difference in residual current between an  $A_x$  oligonucleotide and poly(dC) ( $I_{RES\%}^{A_x \text{ oligo}} - I_{RES\%}^{pC}$ ). The mean of the  $\Delta I_{RES\%}$  values from individual experiments and the associated error ( $\pm$  sd) are given. The data were collected by using the voltage protocol described in Experimental Methods. Briefly, +160 mV was applied for 900 ms to drive the negatively charged DNA into the pore, followed by -140 mV for 50 ms, to eject the immobilized DNA and a final step to 0 mV for 50 ms.

| Position of adenine | TBM $\Delta$ 6      |                    |                      | Position of adenine | TBM $\Delta$ 6/M113G |                    |                      |
|---------------------|---------------------|--------------------|----------------------|---------------------|----------------------|--------------------|----------------------|
|                     | $I_{RES}^{A_x}$ (%) | $I_{RES}^{pC}$ (%) | $\Delta I_{RES}$ (%) |                     | $I_{RES}^{A_x}$ (%)  | $I_{RES}^{pC}$ (%) | $\Delta I_{RES}$ (%) |
| 7                   | 21.3 $\pm$ 1.4      | 21.3 $\pm$ 1.4     | 0.0 $\pm$ 0.0        | 7                   | 23.5 $\pm$ 0.5       | 23.5 $\pm$ 0.5     | 0.0 $\pm$ 0.0        |
| 8                   | 21.3 $\pm$ 1.8      | 21.3 $\pm$ 1.8     | 0.0 $\pm$ 0.0        | 8                   | 25.5 $\pm$ 2.0       | 25.5 $\pm$ 2.0     | 0.0 $\pm$ 0.0        |
| 9                   | 22.2 $\pm$ 1.0      | 22.6 $\pm$ 1.1     | -0.4 $\pm$ 0.1       | 9                   | 24.6 $\pm$ 1.3       | 24.6 $\pm$ 1.3     | 0.0 $\pm$ 0.0        |
| 10                  | 21.6 $\pm$ 0.3      | 21.6 $\pm$ 0.3     | 0.0 $\pm$ 0.0        | 10                  | 24.1 $\pm$ 0.2       | 23.7 $\pm$ 0.3     | +0.4 $\pm$ 0.1       |
| 11                  | 22.8 $\pm$ 1.3      | 23.7 $\pm$ 1.2     | +0.9 $\pm$ 0.1       | 11                  | 26.0 $\pm$ 1.4       | 24.6 $\pm$ 1.3     | +1.4 $\pm$ 0.1       |
| 12                  | 23.0 $\pm$ 0.5      | 21.9 $\pm$ 0.6     | +1.1 $\pm$ 0.0       | 12                  | 25.0 $\pm$ 0.2       | 23.7 $\pm$ 0.2     | +1.3 $\pm$ 0.1       |
| 13                  | 22.1 $\pm$ 0.6      | 22.1 $\pm$ 0.6     | 0.0 $\pm$ 0.0        | 13                  | 25.9 $\pm$ 1.8       | 25.9 $\pm$ 1.8     | 0.0 $\pm$ 0.0        |
| 14                  | 20.8 $\pm$ 0.2      | 22.1 $\pm$ 0.2     | -1.3 $\pm$ 0.0       | 14                  | 23.1 $\pm$ 1.0       | 24.4 $\pm$ 1.0     | -1.3 $\pm$ 0.0       |
| 15                  | 21.0 $\pm$ 0.1      | 21.8 $\pm$ 0.1     | -0.9 $\pm$ 0.1       | 15                  | 22.8 $\pm$ 0.2       | 23.7 $\pm$ 0.2     | -0.9 $\pm$ 0.1       |
| 16                  | 21.5 $\pm$ 0.1      | 21.5 $\pm$ 0.1     | 0.0 $\pm$ 0.0        | 16                  | 25.5 $\pm$ 1.9       | 25.8 $\pm$ 1.9     | -0.3 $\pm$ 0.1       |
| 17                  | 23.0 $\pm$ 1.4      | 23.0 $\pm$ 1.4     | 0.0 $\pm$ 0.0        | 17                  | 25.2 $\pm$ 1.8       | 25.2 $\pm$ 1.8     | 0.0 $\pm$ 0.0        |
| 18                  | 22.2 $\pm$ 0.1      | 22.2 $\pm$ 0.1     | 0.0 $\pm$ 0.0        | 18                  | 23.5 $\pm$ 0.4       | 23.5 $\pm$ 0.4     | 0.0 $\pm$ 0.0        |

**Table S4.** Residual currents ( $I_{RES\%}$ ) for poly(dC) and oligonucleotides that contain a single substituted base at position 18 ( $\alpha$ HL NN), 16 (TBM $\Delta$ 2 and TBM $\Delta$ 4) or 13 (TBM $\Delta$ 6 and TBM $\Delta$ 6/M113G) blocking pores.  $I_{RES\%}$ ,  $\Delta I_{RES\%}^{OVERALL}$  and  $\delta$  values are shown for  $n \geq 3$  experiments.  $\Delta I_{RES\%}^{OVERALL}$  is defined as the difference in residual current between the two most widely dispersed current peaks. The  $\delta$  value is the product of the successive differences between the peaks. If any two peaks overlap, then the  $\delta$  value is equal to zero. Mean values ( $\pm$  s.d.) are given.

|                  | Residual Current (%) |                |                |                | Residual Current Difference (%)   |                 |
|------------------|----------------------|----------------|----------------|----------------|-----------------------------------|-----------------|
| NN               | $C_{18}$             | $T_{18}$       | $A_{18}$       | $G_{18}$       | $\Delta I_{RES}^{OVERALL}$<br>(%) | $\delta$        |
|                  | $36.9 \pm 0.5$       | $36.4 \pm 0.5$ | $36.0 \pm 0.5$ | $35.7 \pm 0.5$ | $1.2 \pm 0.0$                     | $0.07 \pm 0.00$ |
| $\Delta 2$       | $C_{16}$             | $T_{16}$       | $A_{16}$       | $G_{16}$       | $\Delta I_{RES}^{OVERALL}$<br>(%) | $\delta$        |
|                  | $35.7 \pm 0.1$       | $34.2 \pm 0.1$ | $34.2 \pm 0.1$ | $35.0 \pm 0.1$ | $1.5 \pm 0.1$                     | $0.00 \pm 0.00$ |
| $\Delta 4$       | $C_{16}$             | $T_{16}$       | $A_{16}$       | $G_{16}$       | $\Delta I_{RES}^{OVERALL}$<br>(%) | $\delta$        |
|                  | $31.4 \pm 2.8$       | $30.0 \pm 2.7$ | $30.0 \pm 2.7$ | $30.0 \pm 2.7$ | $1.4 \pm 0.1$                     | $0.00 \pm 0.00$ |
| $\Delta 6$       | $C_{13}$             | $T_{13}$       | $A_{13}$       | $G_{13}$       | $\Delta I_{RES}^{OVERALL}$<br>(%) | $\delta$        |
|                  | $22.9 \pm 1.4$       | $20.9 \pm 1.3$ | $21.6 \pm 1.3$ | $22.2 \pm 1.3$ | $2.0 \pm 0.2$                     | $0.29 \pm 0.06$ |
| $\Delta 6/M113G$ | $C_{13}$             | $T_{13}$       | $A_{13}$       | $G_{13}$       | $\Delta I_{RES}^{OVERALL}$<br>(%) | $\delta$        |
|                  | $24.2 \pm 0.3$       | $22.4 \pm 0.3$ | $22.8 \pm 0.3$ | $23.7 \pm 0.3$ | $1.8 \pm 0.1$                     | $0.19 \pm 0.03$ |

**Table S5.** Kinetic parameters for the interaction of am<sub>7</sub>βCD with the homoheptameric TBMΔ6 and TBMΔ6/M113N mutant pores.  $k_{on} = 1/\tau_{on}[am_7\beta CD]$ , where  $\tau_{on}$  is the mean inter-event interval.  $k_{off} = 1/\tau_{off}$ , where  $\tau_{off}$  is the mean dwell time of am<sub>7</sub>βCD in the pore.  $K_D = k_{off}/k_{on}$ . Values are shown for  $n \geq 3$  experiments. Mean values ( $\pm$  s.d.) are given.

|             | at +120 mV, 40 μM am <sub>7</sub> βCD<br>(added to <i>trans</i> ) |                              |            |
|-------------|-------------------------------------------------------------------|------------------------------|------------|
|             | $k_{on}$ (M <sup>-1</sup> s <sup>-1</sup> )                       | $k_{off}$ (s <sup>-1</sup> ) | $K_D$ (mM) |
| TBMΔ6       | 33000 ±1000                                                       | 4600 ±300                    | 143 ±8     |
| TBMΔ6/M113N | 21200 ±1000                                                       | 2200 ±200                    | 104 ±4     |

**Table S6.** Kinetic parameters for dNMP and rNMP identification. Comparison of the kinetic parameters of mononucleotide binding to am<sub>7</sub>βCD within the TBMΔ6, TBMΔ6/M113F and TBMΔ6/M113N αHL pores, at pH 6.0 (+120 mV). Mean  $\tau_{\text{off}}$ ,  $k_{\text{off}}$ ,  $I_{\text{RES}\%}$ ,  $\Delta I_{\text{RES}\%}^{\text{OVERALL}}$  and  $\delta$  values are shown for  $n \geq 3$  experiments. Values of  $k_{\text{off}}$  were determined by using  $k_{\text{off}} = 1/\tau_{\text{off}}$ , where  $\tau_{\text{off}}$  is the mean dwell time of each NMP in the pore.  $I_0$  and  $I_{\text{RES}\%}$  values are mean values ( $\pm$ s.d.) taken from Gaussian fits to event histograms.  $I_{\text{RES}\%} = (I_{\text{RES}}/I_0) \times 100$ .  $\Delta I_{\text{RES}\%}^{\text{OVERALL}}$  is defined as the difference in residual current between the two most widely dispersed current peaks. The  $\delta$  value is the product of the successive differences between the peaks. If any two peaks overlap, then the  $\delta$  value is equal to zero. Mean values ( $\pm$  s.d.) are given.

|                                              |                             | 40 $\mu\text{M}$ am <sub>7</sub> βCD ( <i>trans</i> ) at +120 mV ( $n \geq 3$ ) |                         |                             |                                        |                         |                             |                                        |                         |  |
|----------------------------------------------|-----------------------------|---------------------------------------------------------------------------------|-------------------------|-----------------------------|----------------------------------------|-------------------------|-----------------------------|----------------------------------------|-------------------------|--|
| Mononucleotide                               | TBMΔ6                       |                                                                                 |                         | TBMΔ6/M113F                 |                                        |                         | TBMΔ6/M113N                 |                                        |                         |  |
|                                              | $\tau_{\text{off}}$<br>(ms) | $k_{\text{off}}$<br>(s <sup>-1</sup> )                                          | $I_{\text{RES}}$<br>(%) | $\tau_{\text{off}}$<br>(ms) | $k_{\text{off}}$<br>(s <sup>-1</sup> ) | $I_{\text{RES}}$<br>(%) | $\tau_{\text{off}}$<br>(ms) | $k_{\text{off}}$<br>(s <sup>-1</sup> ) | $I_{\text{RES}}$<br>(%) |  |
| dGMP                                         | 15.0<br>$\pm 1.0$           | 69.0<br>$\pm 1.0$                                                               | 44.2<br>$\pm 0.3$       | 18.0<br>$\pm 1.0$           | 54.0<br>$\pm 2.0$                      | 19.9<br>$\pm 2.0$       | 8.0<br>$\pm 1.0$            | 121.0<br>$\pm 1.0$                     | 22.8<br>$\pm 0.4$       |  |
| dAMP                                         | 14.0<br>$\pm 1.0$           | 73.0<br>$\pm 2.0$                                                               | 45.3<br>$\pm 0.3$       | 17.0<br>$\pm 1.0$           | 60.0<br>$\pm 2.0$                      | 22.5<br>$\pm 1.8$       | 6.0<br>$\pm 2.0$            | 164.0<br>$\pm 2.0$                     | 25.2<br>$\pm 0.8$       |  |
| dCMP                                         | 10.0<br>$\pm 2.0$           | 98.0<br>$\pm 1.0$                                                               | 46.8<br>$\pm 0.3$       | 15.0<br>$\pm 1.0$           | 65.0<br>$\pm 1.0$                      | 25.9<br>$\pm 1.8$       | 14.0<br>$\pm 1.0$           | 72.0<br>$\pm 2.0$                      | 25.6<br>$\pm 0.5$       |  |
| dTMP                                         | 11.0<br>$\pm 1.0$           | 90.0<br>$\pm 2.0$                                                               | 46.3<br>$\pm 0.4$       | 21.0<br>$\pm 1.0$           | 47.0<br>$\pm 1.0$                      | 21.5<br>$\pm 2.4$       | 17.0<br>$\pm 2.0$           | 58.0<br>$\pm 2.0$                      | 23.1<br>$\pm 0.4$       |  |
| $\Delta I_{\text{RES}}^{\text{OVERALL}}$ (%) | 2.6 $\pm 0.4$               |                                                                                 |                         | 6.0 $\pm 1.4$               |                                        |                         | 2.8 $\pm 0.6$               |                                        |                         |  |
| $\delta$                                     | 0.5 $\pm 0.1$               |                                                                                 |                         | 5.4 $\pm 0.4$               |                                        |                         | 0.3 $\pm 0.1$               |                                        |                         |  |
|                                              |                             |                                                                                 |                         |                             |                                        |                         |                             |                                        |                         |  |
| rGMP                                         | 16.0<br>$\pm 1.0$           | 61.0<br>$\pm 1.0$                                                               | 41.6<br>$\pm 0.6$       | 7.0<br>$\pm 2.0$            | 152.0<br>$\pm 1.0$                     | 14.9<br>$\pm 1.2$       | 15.0<br>$\pm 3.0$           | 68.0<br>$\pm 2.0$                      | 30.4<br>$\pm 0.3$       |  |
| rAMP                                         | 14.0<br>$\pm 1.0$           | 70.0<br>$\pm 2.0$                                                               | 43.2<br>$\pm 0.4$       | 14.0<br>$\pm 1.0$           | 70.0<br>$\pm 2.0$                      | 17.1<br>$\pm 1.5$       | 9.0<br>$\pm 2.0$            | 108.7<br>$\pm 2.0$                     | 29.5<br>$\pm 0.3$       |  |
| rCMP                                         | 19.0<br>$\pm 1.0$           | 52.0<br>$\pm 2.0$                                                               | 43.9<br>$\pm 0.7$       | 9.0<br>$\pm 1.0$            | 111.0<br>$\pm 1.0$                     | 17.9<br>$\pm 1.2$       | 18.0<br>$\pm 1.0$           | 55.2<br>$\pm 2.0$                      | 28.2<br>$\pm 0.4$       |  |
| rUMP                                         | 12.0<br>$\pm 1.0$           | 85.0<br>$\pm 1.0$                                                               | 44.1<br>$\pm 0.6$       | 6.0<br>$\pm 1.0$            | 167.0<br>$\pm 2.0$                     | 20.4<br>$\pm 1.4$       | 10.0<br>$\pm 2.0$           | 96.2<br>$\pm 3.0$                      | 27.9<br>$\pm 0.6$       |  |
| $\Delta I_{\text{RES}}^{\text{OVERALL}}$ (%) | 2.3 $\pm 0.6$               |                                                                                 |                         | 5.5 $\pm 1.2$               |                                        |                         | 2.5 $\pm 0.3$               |                                        |                         |  |
| $\delta$                                     | 0.2 $\pm 0.1$               |                                                                                 |                         | 4.4 $\pm 0.6$               |                                        |                         | 0.4 $\pm 0.1$               |                                        |                         |  |

**Table S7.** Voltage dependences of the residual currents ( $I_{RES\%}$ ), dwell times ( $\tau_{off}$ ) and dissociation rate constants ( $k_{off} = 1/\tau_{off}$ ) for dNMP bound to the TBM $\Delta$ 6/M113F $\cdot$ am $\gamma$ 7 $\beta$ CD  $\alpha$ HL pore. Mean  $\tau_{off}$ ,  $k_{off}$ ,  $I_{RES\%}$  are shown for  $n \geq 3$  experiments. Values of  $k_{off}$  were determined by using  $k_{off} = 1/\tau_{off}$ , where  $\tau_{off}$  is the mean dwell time of each NMP in the pore.  $I_O$  and  $I_{RES\%}$  values are mean values ( $\pm$ s.d.) taken from Gaussian fits to event histograms.  $I_{RES\%} = (I_{RES}/I_O) \times 100$ .

| Nucleotide | Potential | $\tau_{off}$      | $k_{off} = 1/\tau_{off}$ | $I_{RES}$         | Nucleotide | Potential | $\tau_{off}$      | $k_{off} = 1/\tau_{off}$ | $I_{RES}$         |
|------------|-----------|-------------------|--------------------------|-------------------|------------|-----------|-------------------|--------------------------|-------------------|
|            | mV        | ms                | $s^{-1}$                 | (%)               |            | mV        | ms                | $s^{-1}$                 | (%)               |
| dGMP       | 100       | 16.0<br>$\pm 1.0$ | 63.0<br>$\pm 1.0$        | 15.3<br>$\pm 1.2$ | dCMP       | 100       | 13.0<br>$\pm 1.0$ | 77.0<br>$\pm 2.0$        | 23.2<br>$\pm 1.3$ |
|            | 120       | 18.0<br>$\pm 1.0$ | 54.0<br>$\pm 2.0$        | 19.9<br>$\pm 2.0$ |            | 120       | 15.0<br>$\pm 2.0$ | 65.0<br>$\pm 1.0$        | 25.9<br>$\pm 1.8$ |
|            | 140       | 23.0<br>$\pm 2.0$ | 43.0<br>$\pm 1.0$        | 21.6<br>$\pm 1.6$ |            | 140       | 17.0<br>$\pm 1.0$ | 59.0<br>$\pm 1.0$        | 27.4<br>$\pm 1.4$ |
|            | 160       | 27.0<br>$\pm 2.0$ | 37.0<br>$\pm 1.0$        | 24.6<br>$\pm 1.6$ |            | 160       | 18.0<br>$\pm 1.0$ | 56.0<br>$\pm 1.0$        | 29.1<br>$\pm 1.6$ |
|            | 180       | 32.0<br>$\pm 2.0$ | 31.0<br>$\pm 1.0$        | 27.5<br>$\pm 2.2$ |            | 180       | 21.0<br>$\pm 2.0$ | 48.0<br>$\pm 1.0$        | 31.3<br>$\pm 1.5$ |
|            | 200       | 30.0<br>$\pm 2.0$ | 33.0<br>$\pm 1.0$        | 31.1<br>$\pm 1.4$ |            | 200       | 24.0<br>$\pm 2.0$ | 42.0<br>$\pm 2.0$        | 33.1<br>$\pm 1.4$ |
| dAMP       | 100       | 16.0<br>$\pm 1.0$ | 63.0<br>$\pm 1.0$        | 20.4<br>$\pm 0.8$ | dTMP       | 100       | 19.0<br>$\pm 1.0$ | 53.0<br>$\pm 1.0$        | 19.8<br>$\pm 1.6$ |
|            | 120       | 17.0<br>$\pm 1.0$ | 60.0<br>$\pm 2.0$        | 22.5<br>$\pm 1.8$ |            | 120       | 21.0<br>$\pm 1.0$ | 47.0<br>$\pm 1.0$        | 21.5<br>$\pm 2.4$ |
|            | 140       | 21.0<br>$\pm 2.0$ | 48.0<br>$\pm 1.0$        | 29.7<br>$\pm 1.6$ |            | 140       | 27.0<br>$\pm 1.0$ | 37.0<br>$\pm 2.0$        | 24.6<br>$\pm 1.6$ |
|            | 160       | 29.0<br>$\pm 2.0$ | 34.0<br>$\pm 2.0$        | 32.4<br>$\pm 1.6$ |            | 160       | 31.0<br>$\pm 1.0$ | 32.0<br>$\pm 1.0$        | 27.3<br>$\pm 1.3$ |
|            | 180       | 28.0<br>$\pm 2.0$ | 36.0<br>$\pm 2.0$        | 34.1<br>$\pm 0.8$ |            | 180       | 29.0<br>$\pm 1.0$ | 34.0<br>$\pm 1.0$        | 29.8<br>$\pm 1.4$ |
|            | 200       | 33.0<br>$\pm 1.0$ | 30.0<br>$\pm 1.0$        | 35.8<br>$\pm 1.9$ |            | 200       | 32.0<br>$\pm 1.0$ | 31.0<br>$\pm 2.0$        | 32.3<br>$\pm 1.8$ |



**Table S8.** Voltage dependences of the residual currents ( $I_{RES\%}$ ), dwell times ( $\tau_{off}$ ) and dissociation rate constants ( $k_{off} = 1/\tau_{off}$ ) for rNMP bound to the TBM $\Delta$ 6/M113F $\cdot$ am $\gamma$ 7 $\beta$ CD pore. Mean  $\tau_{off}$ ,  $k_{off}$ ,  $I_{RES\%}$  are shown for  $n \geq 3$  experiments. Values of  $k_{off}$  were determined by using  $k_{off} = 1/\tau_{off}$ , where  $\tau_{off}$  is the mean dwell time of each NMP in the pore.  $I_0$  and  $I_{RES\%}$  values are mean values ( $\pm$ s.d.) taken from Gaussian fits to event histograms.  $I_{RES\%} = (I_{RES}/I_0) \times 100$ .

| Nucleotide | Potential | $\tau_{off}$      | $k_{off} = 1/\tau_{off}$ | $I_{RES}$         | Nucleotide | Potential | $\tau_{off}$      | $k_{off} = 1/\tau_{off}$ | $I_{RES}$         |
|------------|-----------|-------------------|--------------------------|-------------------|------------|-----------|-------------------|--------------------------|-------------------|
|            | mV        | ms                | $s^{-1}$                 | (%)               |            | mV        | ms                | $s^{-1}$                 | (%)               |
| rGMP       | 100       | 6.0<br>$\pm 1.0$  | 167.0<br>$\pm 2.0$       | 9.3<br>$\pm 1.2$  | rCMP       | 100       | 8.0<br>$\pm 1.0$  | 125.0<br>$\pm 1.0$       | 15.4<br>$\pm 1.2$ |
|            | 120       | 7.0<br>$\pm 2.0$  | 152.0<br>$\pm 1.0$       | 14.9<br>$\pm 1.2$ |            | 120       | 9.0<br>$\pm 1.0$  | 111.0<br>$\pm 1.0$       | 17.9<br>$\pm 1.2$ |
|            | 140       | 12.0<br>$\pm 1.0$ | 83.0<br>$\pm 1.0$        | 19.3<br>$\pm 2.0$ |            | 140       | 13.0<br>$\pm 1.0$ | 77.0<br>$\pm 2.0$        | 23.3<br>$\pm 1.4$ |
|            | 160       | 13.0<br>$\pm 2.0$ | 77.0<br>$\pm 1.0$        | 22.7<br>$\pm 2.0$ |            | 160       | 17.0<br>$\pm 2.0$ | 59.0<br>$\pm 1.0$        | 27.6<br>$\pm 1.6$ |
|            | 180       | 16.0<br>$\pm 2.0$ | 63.0<br>$\pm 2.0$        | 29.2<br>$\pm 2.0$ |            | 180       | 21.0<br>$\pm 1.0$ | 48.0<br>$\pm 1.0$        | 31.1<br>$\pm 1.2$ |
|            | 200       | 17.0<br>$\pm 2.0$ | 59.0<br>$\pm 1.0$        | 31.1<br>$\pm 1.4$ |            | 200       | 20.0<br>$\pm 1.0$ | 50.0<br>$\pm 1.0$        | 34.8<br>$\pm 2.0$ |
| rAMP       | 100       | 13.0<br>$\pm 1.0$ | 77.0<br>$\pm 2.0$        | 14.6<br>$\pm 1.2$ | rUMP       | 100       | 5.0<br>$\pm 1.0$  | 200.0<br>$\pm 1.0$       | 19.2<br>$\pm 2.0$ |
|            | 120       | 14.0<br>$\pm 1.0$ | 70.0<br>$\pm 2.0$        | 17.1<br>$\pm 1.5$ |            | 120       | 6.0<br>$\pm 1.0$  | 167.0<br>$\pm 2.0$       | 20.4<br>$\pm 1.4$ |
|            | 140       | 16.0<br>$\pm 2.0$ | 62.0<br>$\pm 1.0$        | 19.6<br>$\pm 1.4$ |            | 140       | 10.0<br>$\pm 1.0$ | 100.0<br>$\pm 1.0$       | 24.4<br>$\pm 2.0$ |
|            | 160       | 17.0<br>$\pm 1.0$ | 59.0<br>$\pm 1.0$        | 23.5<br>$\pm 1.2$ |            | 160       | 13.0<br>$\pm 2.0$ | 77.0<br>$\pm 2.0$        | 29.6<br>$\pm 1.8$ |
|            | 180       | 20.0<br>$\pm 1.0$ | 50.0<br>$\pm 1.0$        | 28.6<br>$\pm 2.0$ |            | 180       | 17.0<br>$\pm 1.0$ | 59.0<br>$\pm 2.0$        | 32.3<br>$\pm 2.0$ |
|            | 200       | 22.0<br>$\pm 2.0$ | 45.0<br>$\pm 2.0$        | 32.3<br>$\pm 1.6$ |            | 200       | 21.0<br>$\pm 2.0$ | 48.0<br>$\pm 1.0$        | 35.8<br>$\pm 1.6$ |

**Figure S1.** The structure of the biotin-TEG linker used to biotinylate the 3' end of the DNA oligonucleotides. The structure was produced with ChemBioDraw Ultra 12.0. The length of the linker, from the biotin to the 3'-phosphate of the first DNA base is ~3 nm, as measured by using Pymol.

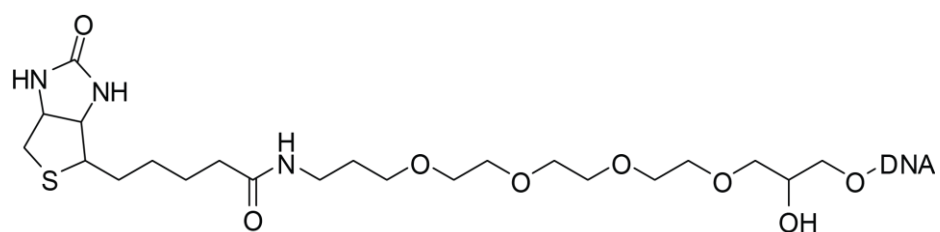

**Figure S2.** Current-voltage (IV) curves for  $\alpha$ HL NN, TBM $\Delta$ 6, TBM $\Delta$ 6/M113G, TBM $\Delta$ 6/M113F and TBM $\Delta$ 6/M113N. The mean current levels for individual pores ( $\pm$  s.d.) were determined ( $n \geq 3$ ) in 1 M KCl, 25 mM Tris.HCl, pH 8.0, containing 0.1 mM EDTA, over a range of applied potentials: TBM $\Delta$ 6 (navy) and (A)  $\alpha$ HL NN (yellow); (B) TBM $\Delta$ 6/M113G (purple); (C) TBM $\Delta$ 6/M113F (red); (D) TBM $\Delta$ 6/M113N (green).

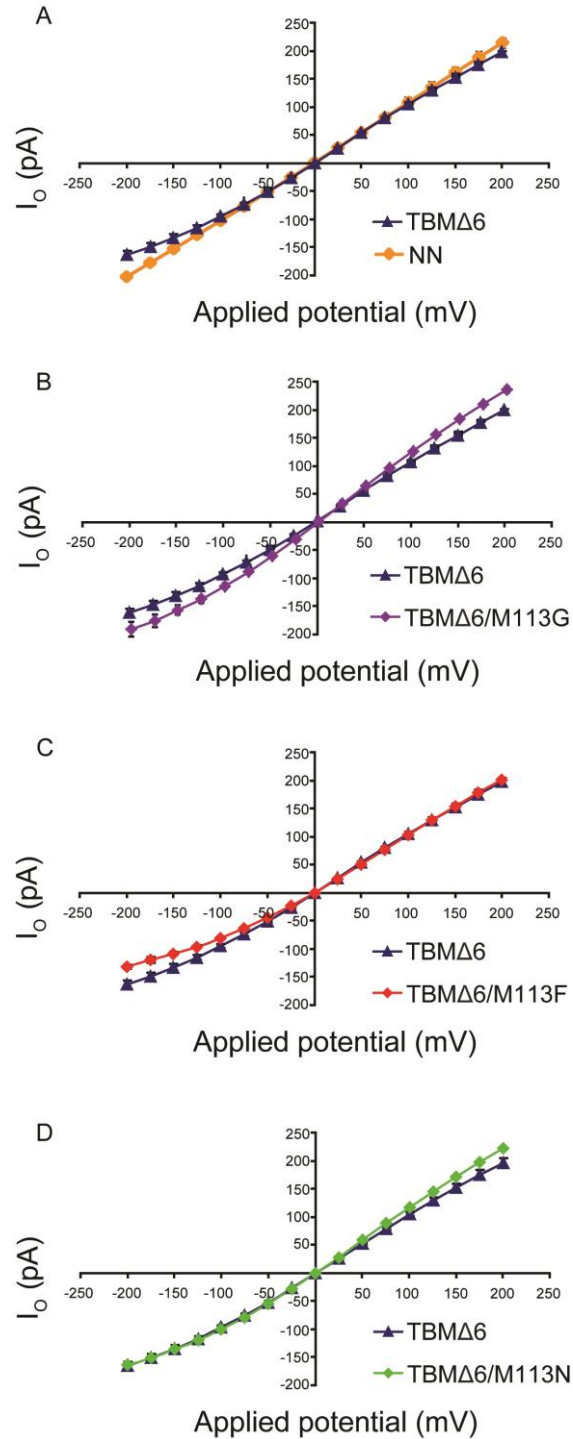

**Figure S3.** Representative single-channel recordings with the  $\alpha$ HL TBM $\Delta$ 6,  $\Delta$ 6/M113N and  $\Delta$ 6/M113F pores, showing CD adapter binding ( $40 \mu\text{M}$  am $_7\beta$ CD, *trans*). In the case of TBM  $\Delta$ 6/M113F, the am $_7\beta$ CD remains bound for >1.5 h. The traces were recorded in 1 M KCl, 25 mM Tris.HCl, at pH 6.0.

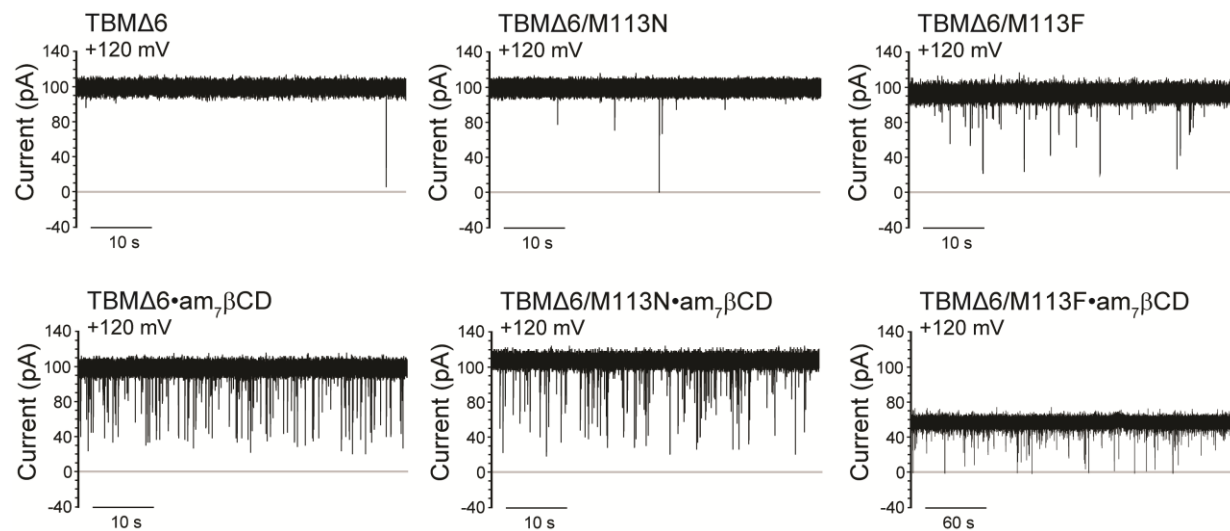

**Figure S5.** (A) Variation of residual currents ( $I_{RES\%}$ ) with applied potential for each dNMP detected with the TBM $\Delta$ 6/M113F $\cdot$ am $_7$  $\beta$ CD pore. (B) Variation of  $k_{off}$  with applied potential for each dNMP detected with the TBM $\Delta$ 6/M113F $\cdot$ am $_7$  $\beta$ CD pore. Number of experiments:  $n \geq 3$ . The data are tabulated in **Table S7**.

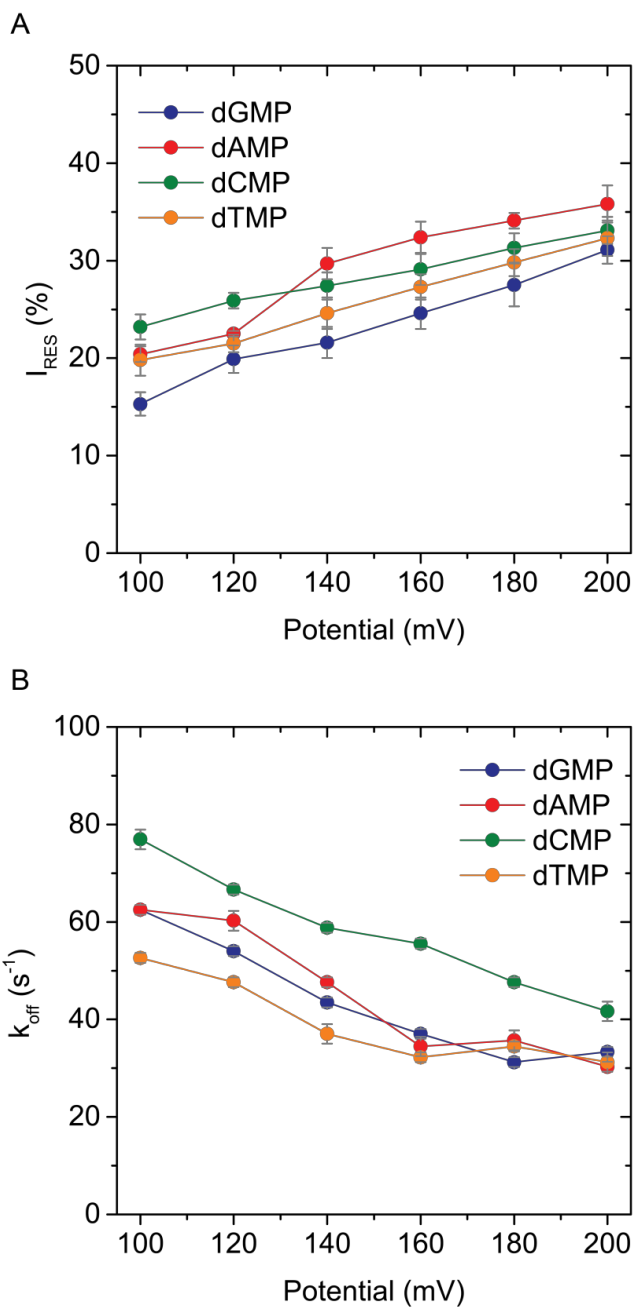

**Figure S6.** (A) Variation of residual currents ( $I_{RES\%}$ ) with applied potential for each rNMP detected with the TBM $\Delta$ 6/M113F $\cdot$ am $_7$  $\beta$ CD pore. (B) Variation of  $k_{off}$  with applied potential for each rNMP detected with the TBM $\Delta$ 6/M113F $\cdot$ am $_7$  $\beta$ CD pore. Number of experiments:  $n \geq 3$ . The data are tabulated in **Table S8**.

A

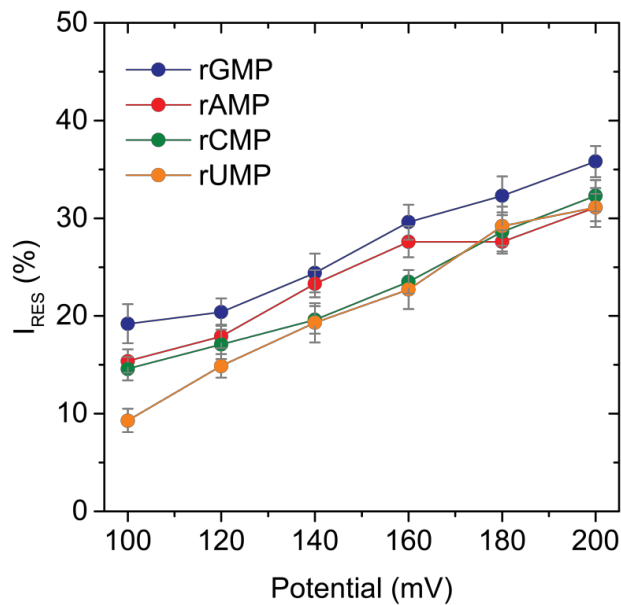

B

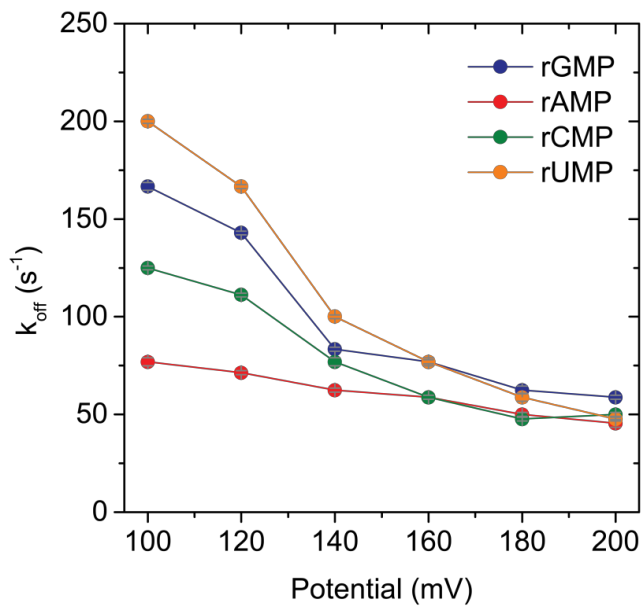

**Figure S7.** Typical current traces for the TBM $\Delta$ 6 pore when blocked with immobilized poly(dC)<sub>40</sub> or poly(dC)<sup>A15</sup> oligonucleotides.

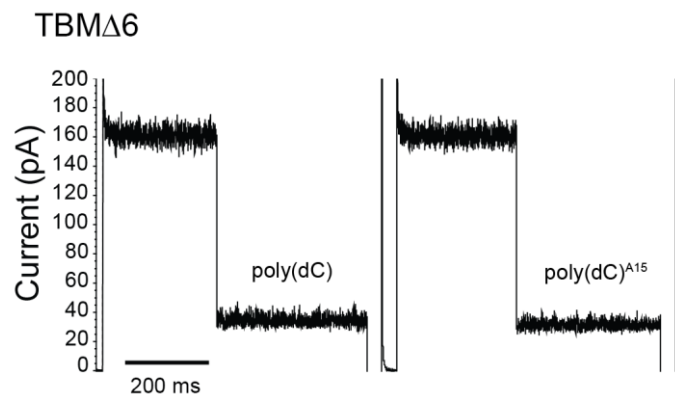

Supplement: NIHMS772600-supplement-supporting_information.pdf [file NIHMS772600-supplement-supporting_information.pdf]
